# Supplementary material for: Defect-rich WS2–SPAN nanofibers for sodium/potassium-ion batteries: ultralong lifespans and wide-temperature workability
Source: Royal Society of Chemistry journal article supplement (doi:10.1039/d2qi02483g), 2023-01-01
Supplement: d2qi02483g1.pdf [file d2qi02483g1.pdf]

## Supporting Information

### Characterization

Using X-ray diffraction (XRD) to ascertain the crystal phase of composition at  $10^\circ$  to  $80^\circ$  by Bruker D8 diffractometer. The surface morphology and internal crystal structure of samples were observed by SEM (Hitachi 8100) and TEM (FEI F20 S-TWIN). The thermogravimetric analysis (TGA) was conducted to measure the compound by TA-SDT Q600 analyzer. The heating rate in the atmosphere was  $10^\circ\text{C min}^{-1}$ . The attribute of chemical bonds was determined by Raman spectroscopy (DXR2xi) of a 532 nm laser. The surface property of the composition was researched by X-ray photoelectron spectroscopy (XPS).

### Electrochemical measurements

For SIBs, the anode electrode was formed by blending the active component, super P and carboxymethyl cellulose (CMC) in a proportion of 8: 1: 1 in deionized water. Each active material loaded in the anode electrodes is closed to  $1.5\text{-}2.5\text{ mg cm}^{-2}$  for SIBs tests system. The solution was fixed to copper foil and dried at  $80^\circ\text{C}$  overnight under vacuum. In the half sodium-ion batteries, 1 M  $\text{NaClO}_4$  in 1:1 (weight ratio) EC/DMC with 5% fluoroethylene carbonate (FEC) additives and whatman glass fiber were conducted as electrolyte and separator, respectively. In the half-cells, sodium metal was served as the counter electrode. For full SIBs, the capacity ratio of  $\text{WS}_2$ -SPAN-2 anode and NVP cathode was optimized to 1: 1.2. The  $\text{WS}_2$ -SPAN-2 anode was pre-cycled for three times before assembling full cells and before measuring the high and low temperature performance.

As for PIBs half-battery, the anode was fabricated by admixing the active materials ( $\text{WS}_2$ -SPAN-2, 80 wt.%) with super P (10 wt.%) and CMC (10 wt.%) in deionized water. Every active material loaded in active materials in the anode electrodes is closed to  $1.5\text{-}2.5\text{ mg cm}^{-2}$  for PIBs tests. In addition, 3.0 M potassium bis(fluorosulfonyl)imide (KFSI) in DME (100% Vol%) was employed as electrolyte. The counter electrode was made up of sheet potassium metal. Notably, all the assembly work was carried out in a glove box filled with high pure argon.

### Electrochemical characterization

Galvanostatic charge/discharge tests and the galvanostatic intermittent titration technique (GITT) of the electrode materials were tested on Land CT 2001A tester between 0.01 to 3 V. The cyclic voltammetry (CV) tests were conducted by an Ivium-n-Stat electrochemical workstation at diverse scan rates (vs.  $\text{Na}/\text{Na}^+$  or  $\text{K}/\text{K}^+$ ).

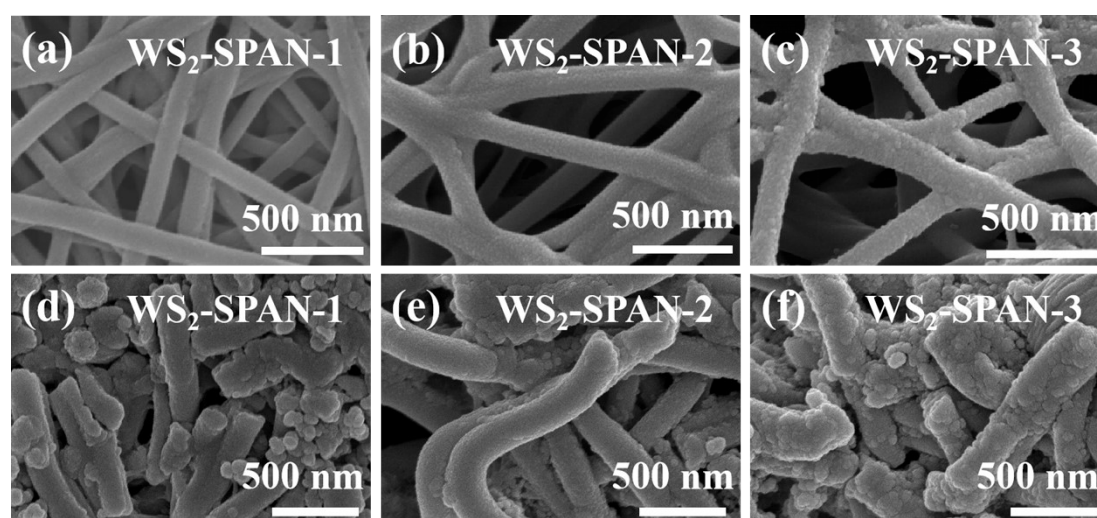

**Fig. S1** SEM images before (a-c) and after cycling (d-f) of  $\text{WS}_2$ -SPAN-1,  $\text{WS}_2$ -SPAN-2 and  $\text{WS}_2$ -SPAN-3 electrodes.

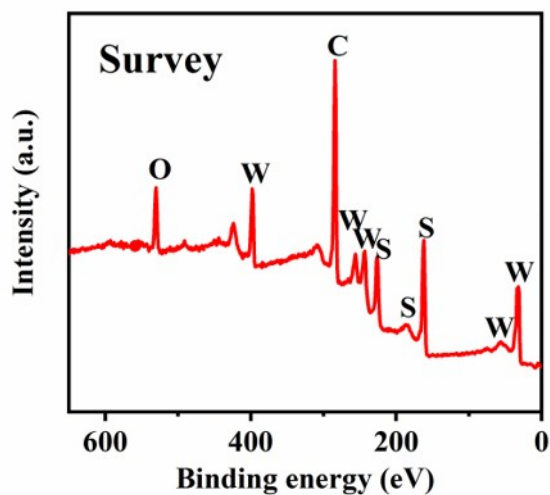

Fig. S2 Survey spectrum of WS<sub>2</sub>-SPAN-2 sample.

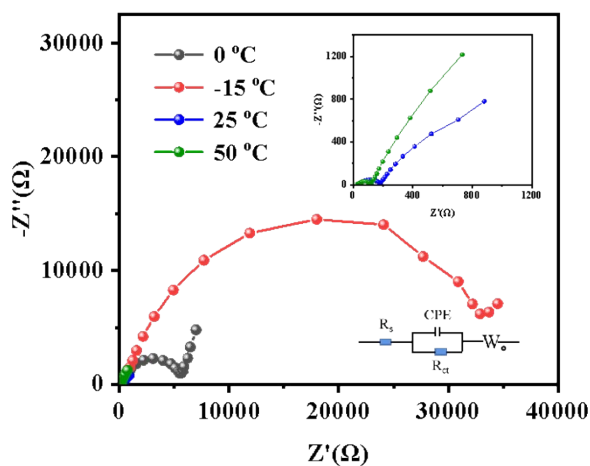

Fig. S3 Electrochemical impedance spectra (EIS) of WS<sub>2</sub>-SPAN-2 electrodes at different temperatures in SIBs.

Table S1 Impedance values fitted from an equivalent circuit model.

| Temperature | R <sub>s</sub> (Ω) | R <sub>ct</sub> (Ω) |
|-------------|--------------------|---------------------|
| -15 °C      | 139.8              | 42294               |
| 0 °C        | 74.5               | 6875                |
| 25 °C       | 30.8               | 170.3               |
| 50 °C       | 23.7               | 122.9               |

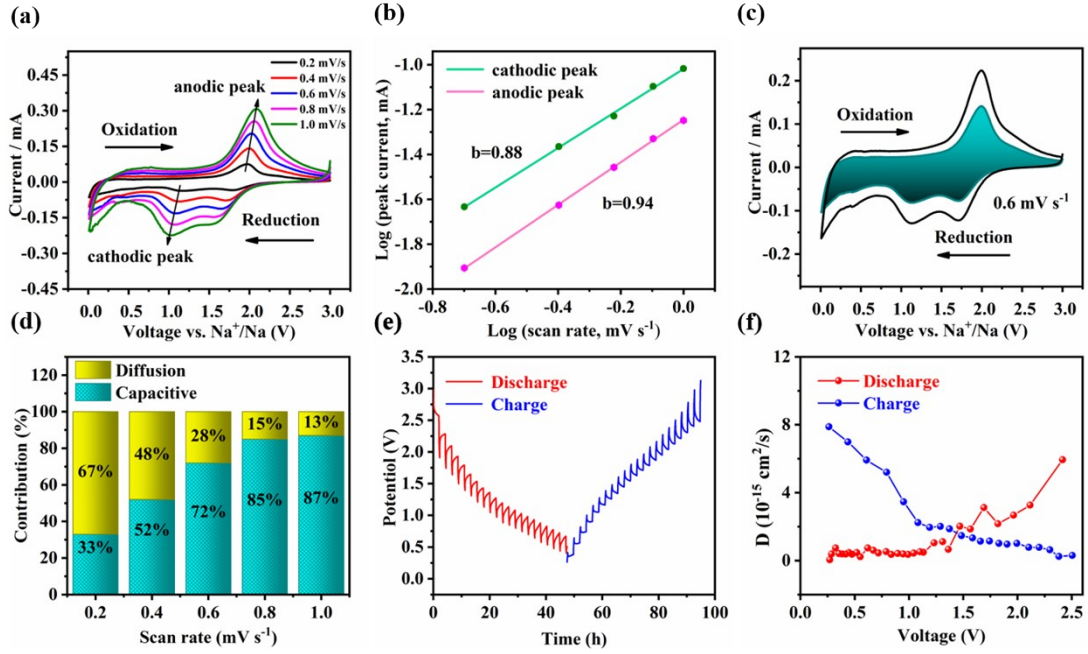

**Fig. S4** (a) Cyclic voltammety curves of WS<sub>2</sub>-SPAN-2 electrode at different scan rates from 0.2 to 1.0 mV·s<sup>-1</sup>. (b) log (i) versus log (v) plots at different oxidation and reduction peaks. (c) Capacitive contribution (green area) of WS<sub>2</sub>-SPAN-2 at 0.6 mV·s<sup>-1</sup>. (d) The diffusion controlled (yellow) and capacitive (blue) capacities of WS<sub>2</sub>-SPAN-2 at different scan rates. (e) GITT charge/discharge profile, (f) Na<sup>+</sup> diffusion coefficients and reaction resistance for the WS<sub>2</sub>-SPAN-2 anode of SIBs.

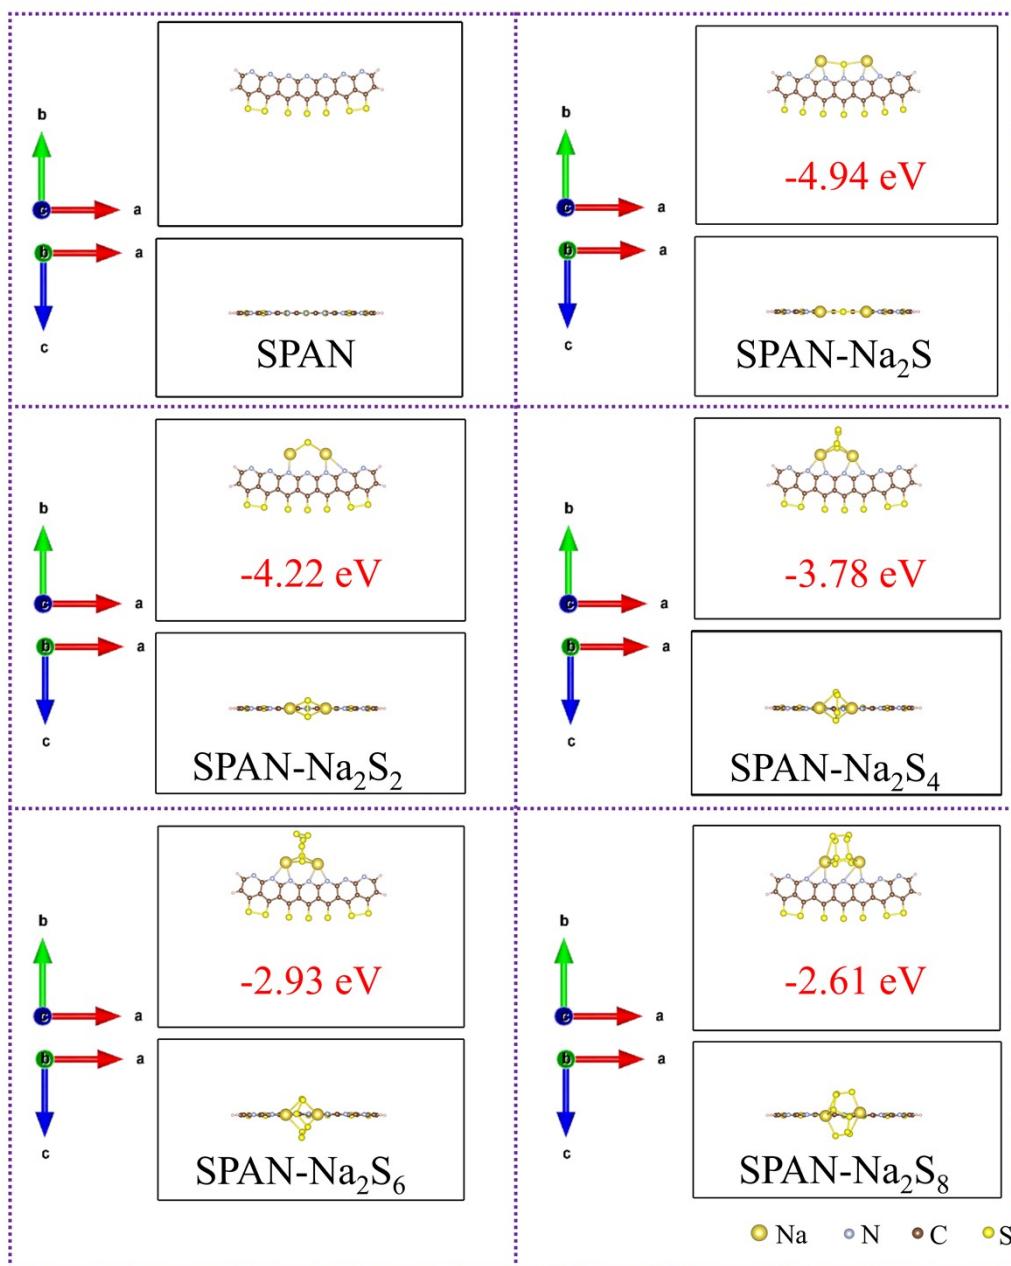

**Fig. S5** Front and top views of optimized configurations of sodium polysulfide  $\text{Na}_2\text{S}_n$  ( $n=1, 2, 4, 6$  and  $8$ ) clusters adsorbed on SPAN.

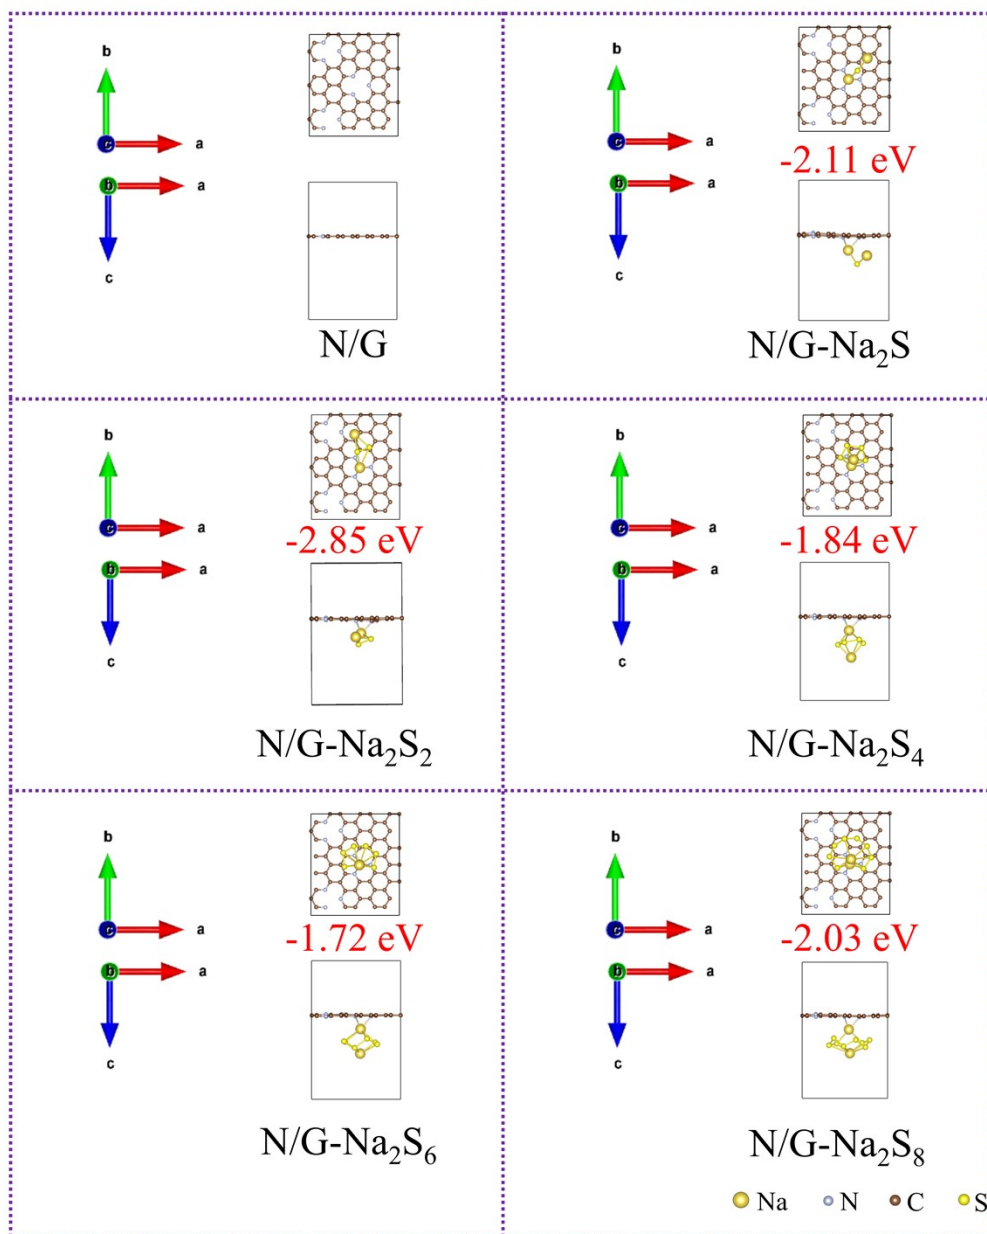

**Fig. S6** Front and top views of optimized configurations of sodium polysulfide  $\text{Na}_2\text{S}_n$  ( $n = 1, 2, 4, 6$  and  $8$ ) clusters adsorbed on N/G.

**Table S2** Cycling performance of the WS<sub>2</sub>-SPAN-2 electrode and newly reported WS<sub>2</sub> based and other anodes for SIBs/PIBs.

| Electrode materials                                     | fields | Cycling capacity (mAh g <sup>-1</sup> ) | Current density (A g <sup>-1</sup> ) | Cycle numbers | Ref.      |
|---------------------------------------------------------|--------|-----------------------------------------|--------------------------------------|---------------|-----------|
| WS <sub>2</sub> -SPAN-2                                 | SIBs   | 464                                     | 0.5                                  | 450           | This work |
|                                                         |        | 354                                     | 2                                    | 1400          |           |
|                                                         |        | 190                                     | 5                                    | 12000         |           |
|                                                         |        | 129                                     | 10                                   | 18000         |           |
| WS <sub>2</sub> -SPAN-2                                 | -15 °C | 307/210                                 | 0.5/1                                | 200/500       | This work |
|                                                         | 0 °C   | 402/266                                 |                                      |               |           |
|                                                         | 25 °C  | 457/382                                 |                                      |               |           |
|                                                         | 50 °C  | 245/228                                 |                                      |               |           |
| WS <sub>2</sub> -SPAN-2                                 | PIBs   | 362                                     | 0.1                                  | 100           | This work |
|                                                         |        | 278                                     | 1                                    | 3000          |           |
| WS <sub>2</sub>                                         | SIBs   | 471                                     | 0.2                                  | 300           | 3         |
|                                                         |        | 240                                     | 5                                    | 250           |           |
| WS <sub>2</sub> @NC                                     | SIBs   | 384                                     | 1                                    | 200           | 11        |
|                                                         |        | 151                                     | 5                                    | 500           |           |
| H-WS <sub>2</sub> @NC                                   | SIBs   | 468                                     | 0.1                                  | 200           | 14        |
|                                                         |        | 375                                     | 1                                    | 1000          |           |
| WS <sub>2</sub> /CNT-rGO                                | SIBs   | 311                                     | 0.1                                  | 100           | 18        |
|                                                         |        | 252                                     | 0.2                                  | 100           |           |
| Co <sub>9</sub> S <sub>8</sub> /WS <sub>2</sub> @N<br>C | SIBs   | 405                                     | 1                                    | 100           | 25        |
|                                                         |        | 354                                     | 2                                    | 120           |           |
| FeSe <sub>2</sub> /rGO                                  | -40 °C | 217                                     | 1                                    | 200           | 37        |
|                                                         | 60 °C  | 422                                     | 5                                    |               |           |
| WS <sub>2</sub> @S/N-C                                  | SIBs   | 321                                     | 0.1                                  | 100           | 44        |
|                                                         |        | 175                                     | 5                                    | 1000          |           |
| C-WS <sub>2</sub> @CNFs                                 | PIBs   | 247                                     | 0.5                                  | 300           | 61        |
|                                                         |        | 168                                     | 2                                    |               |           |
| WS <sub>2</sub> @rGO-HC                                 | SIBs   | 522                                     | 0.1                                  | 70            | S1        |
|                                                         |        | 190                                     | 1                                    | 200           |           |
| WS <sub>2</sub>                                         | PIBs   | 103                                     | 0.1                                  | 100           | S2        |
| FeS <sub>2</sub> /WS <sub>2</sub> -<br>CNFs             | SIBs   | 423                                     | 0.5                                  | 500           | S3        |
|                                                         |        | 308                                     | 4                                    | 1000          |           |
| WS <sub>2</sub> hollow<br>spheres                       | SIBs   | 353                                     | 0.2                                  | 80            | S4        |
|                                                         |        | 285                                     | 2                                    | 2000          |           |

|                                 |      |            |          |            |    |
|---------------------------------|------|------------|----------|------------|----|
| WS <sub>2</sub> -MWCNTs         | SIBs | 289        | 1        | 60         | S5 |
| NGQDs-<br>WS <sub>2</sub> /3DCF | SIBs | 268        | 2        | 1000       | S6 |
| HB WS <sub>2</sub> @CNFs        | SIBs | 381<br>130 | 0.2<br>2 | 100<br>300 | S7 |

### Refs:

- [S1] J. Li, X. Shi, J. Fang, J. Li and Z. Zhang, Facile synthesis of WS<sub>2</sub> nanosheets-carbon composites anodes for sodium and lithium ion batteries, *ChemNanoMat*, 2016, **2**, 997-1002.
- [S2] Y. Wu, Y. Xu, Y. Li, P. Lyu, J. Wen, C. Zhang, M. Zhou, Y. Fang, H. Zhao U. Kaiser and Y. Lei, Unexpected intercalation-dominated potassium storage in WS<sub>2</sub> as a potassium-ion battery anode, *Nano Res.*, 2019, **12**, 2997-3002.
- [S3] H. Wu, N. Xu, Z. Jiang, A. Zheng, Q. Shi, R. Lv, L. Ni, G. Diao and M. Chen, Space and interface confinement effect of necklace-box structural FeS<sub>2</sub>/WS<sub>2</sub> carbon nanofibers to enhance Na<sup>+</sup> storage performance and electrochemical kinetics, *Chem. Eng. J.*, 2022, **427**, 131002.
- [S4] J. Wang, L. Yu, Z. Zhou, L. Zeng and M. Wei, Template-free synthesis of metallic WS<sub>2</sub> hollow microspheres as an anode for the sodium-ion battery, *J. Colloid Interface Sci.*, 2019, **557**, 722-728.
- [S5] X. Li, J. Zhang, Z. Liu, C. Fu and C. Niu, WS<sub>2</sub> nanoflowers on carbon nanotube vines with enhanced electrochemical performances for lithium and sodium-ion batteries, *J. Alloys Compd.*, 2018, **766**, 656-662.
- [S6] Y. Wang, D. Kong, S. Huang, Y. Shi, M. Ding, Y. Von Lim, T. Xu, F. Chen, X. Li and H.Y. Yang, 3D carbon foam-supported WS<sub>2</sub> nanosheets for cable-shaped flexible sodium ion batteries, *J. Mater. Chem. A*, 2018, **6**, 10813-10824.
- [S7] H. Wu, X. Chen, C. Qian, H. Yan, C. Yan, N. Xu, Y. Piao, G. Diao and M. Chen, Confinement growth of layered WS<sub>2</sub> in hollow beaded carbon nanofibers with synergistic anchoring effect to reinforce Li<sup>+</sup>/Na<sup>+</sup> storage performance, *Small*, 2020, **16**, 2000695.
